# Supplementary material
Source: PubMed Central journal article supplement (PMC2856653)
Supplement: NIHMS163402-supplement-02.pdf [file NIHMS163402-supplement-02.pdf]

## Supplementary Material

**Table A (Supplement to Table 3).** Summary of *F* ratios from repeated measures ANOVA performed on CSD-PCA factors at selected sites after restricting participants' age to 20-40 years (40 controls, 47 patients)

|           | Factor (Sites)        |           |                               |                         |  |                                               |                    |  |  |  |
|-----------|-----------------------|-----------|-------------------------------|-------------------------|--|-----------------------------------------------|--------------------|--|--|--|
|           | 442                   |           |                               |                         |  | 723                                           |                    |  |  |  |
|           | P3 source             |           |                               |                         |  | CP source                                     |                    |  |  |  |
|           | (AFz, Fz,<br>FCz, Cz) | (POz)     | (AF7/8, F7/8,<br>F5/6, FC5/6) | (P7/8, P9/10,<br>PO7/8) |  | (CP3/4, CP5/6,<br>P3/4, P5/6,<br>P7/8, PO7/8) | (P9/10,<br>TP9/10) |  |  |  |
| C         | 132.4 ****            | 36.6 **** | 49.5 ****                     | 23.5 ****               |  | 89.8 ****                                     | 72.8 ****          |  |  |  |
| G         | 6.00 *                |           |                               | 11.9 ***                |  | 4.98 *                                        | 2.82               |  |  |  |
| C × G     |                       |           |                               |                         |  | 6.35 *                                        | 15.0 ***           |  |  |  |
| T         | 28.8 ****             |           | 20.5 ****                     | 23.2 ****               |  | 37.5 ****                                     | 3.55               |  |  |  |
| T × G     | 6.38 *                | 7.85 **   |                               | 4.99 *                  |  |                                               |                    |  |  |  |
| T × C     | 9.03 **               | 16.1 **** | 13.6 ***                      |                         |  | 24.8 ****                                     | 5.67 *             |  |  |  |
| T × C × G |                       |           |                               |                         |  | 5.63 *                                        |                    |  |  |  |
| H         | -                     | -         | 4.16 *                        | 16.8 ****               |  | 52.2 ****                                     | 31.1 ****          |  |  |  |
| H × C     | -                     | -         | 7.40 **                       | 15.5 ***                |  | 63.9 ****                                     | 2.98               |  |  |  |
| H × C × G | -                     | -         |                               |                         |  | 3.87 *                                        |                    |  |  |  |
| H × T     | -                     | -         |                               |                         |  |                                               | 37.3 ****          |  |  |  |
| H × T × C | -                     | -         | 17.2 ****                     |                         |  |                                               |                    |  |  |  |

*Note.* G = Group (patients, controls); T = task (word, face); C = condition (new, old); H = hemisphere (left, right). Only *F* ratios with  $p < .10$  are reported for effects pooled over gender and site (subsets as indicated; for all tabled effects,  $df = 1, 83$ ).

- Effect not applicable.

\*  $p \leq .05$ . \*\*  $p \leq .01$ . \*\*\*  $p \leq .001$ , \*\*\*\*  $p \leq .0001$ .

**Table B (Supplement to Table 3).** Summary of *F* ratios from repeated measures ANOVA performed on CSD-PCA factors at selected sites after excluding participants learning English as a secondary language (43 controls, 48 patients)

|           | Factor (Sites)        |           |                               |                         |                                               |                    |  |  |  |  |
|-----------|-----------------------|-----------|-------------------------------|-------------------------|-----------------------------------------------|--------------------|--|--|--|--|
|           | 442                   |           |                               |                         |                                               | 723                |  |  |  |  |
|           | P3 source             |           |                               |                         |                                               | CP source          |  |  |  |  |
|           | (AFz, Fz,<br>FCz, Cz) | (POz)     | (AF7/8, F7/8,<br>F5/6, FC5/6) | (P7/8, P9/10,<br>PO7/8) | (CP3/4, CP5/6,<br>P3/4, P5/6,<br>P7/8, PO7/8) | (P9/10,<br>TP9/10) |  |  |  |  |
| C         | 143.3 ****            | 46.6 **** | 47.7 ****                     | 28.7 ****               | 85.7 ****                                     | 64.7 ****          |  |  |  |  |
| G         | 4.15 *                |           |                               | 4.16 *                  | 5.02 *                                        |                    |  |  |  |  |
| C × G     |                       |           | 4.84 *                        |                         | 8.05 **                                       | 14.5 ***           |  |  |  |  |
| T         | 31.0 ****             |           | 20.1 ****                     | 22.4 ****               | 21.9 ****                                     | 6.24 *             |  |  |  |  |
| T × G     | 3.13                  | 5.22 *    |                               | 3.38                    |                                               |                    |  |  |  |  |
| T × C     | 13.3 ***              | 12.1 ***  | 12.0 ***                      |                         | 28.2 ****                                     | 6.10 *             |  |  |  |  |
| T × C × G |                       |           |                               |                         | 5.67 *                                        |                    |  |  |  |  |
| H         | -                     | -         |                               | 13.5 ***                | 48.7 ****                                     | 21.0 ****          |  |  |  |  |
| H × C     | -                     | -         | 6.95 **                       | 20.8 ****               | 71.5 ****                                     | 7.00 **            |  |  |  |  |
| H × C × G | -                     | -         |                               |                         | 5.48 *                                        |                    |  |  |  |  |
| H × T     | -                     | -         |                               | 2.96                    |                                               | 32.7 ****          |  |  |  |  |
| H × T × C | -                     | -         | 26.4 ****                     |                         |                                               |                    |  |  |  |  |

*Note.* G = Group (patients, controls); T = task (word, face); C = condition (new, old); H = hemisphere (left, right). Only *F* ratios with  $p < .10$  are reported for effects pooled over gender and site (subsets as indicated; for all tabled effects,  $df = 1, 87$ ).

- Effect not applicable.

\*  $p \leq .05$ . \*\*  $p \leq .01$ . \*\*\*  $p \leq .001$ , \*\*\*\*  $p \leq .0001$ .
