# Supplementary material
Source: PubMed Central journal article supplement (PMC2856653)

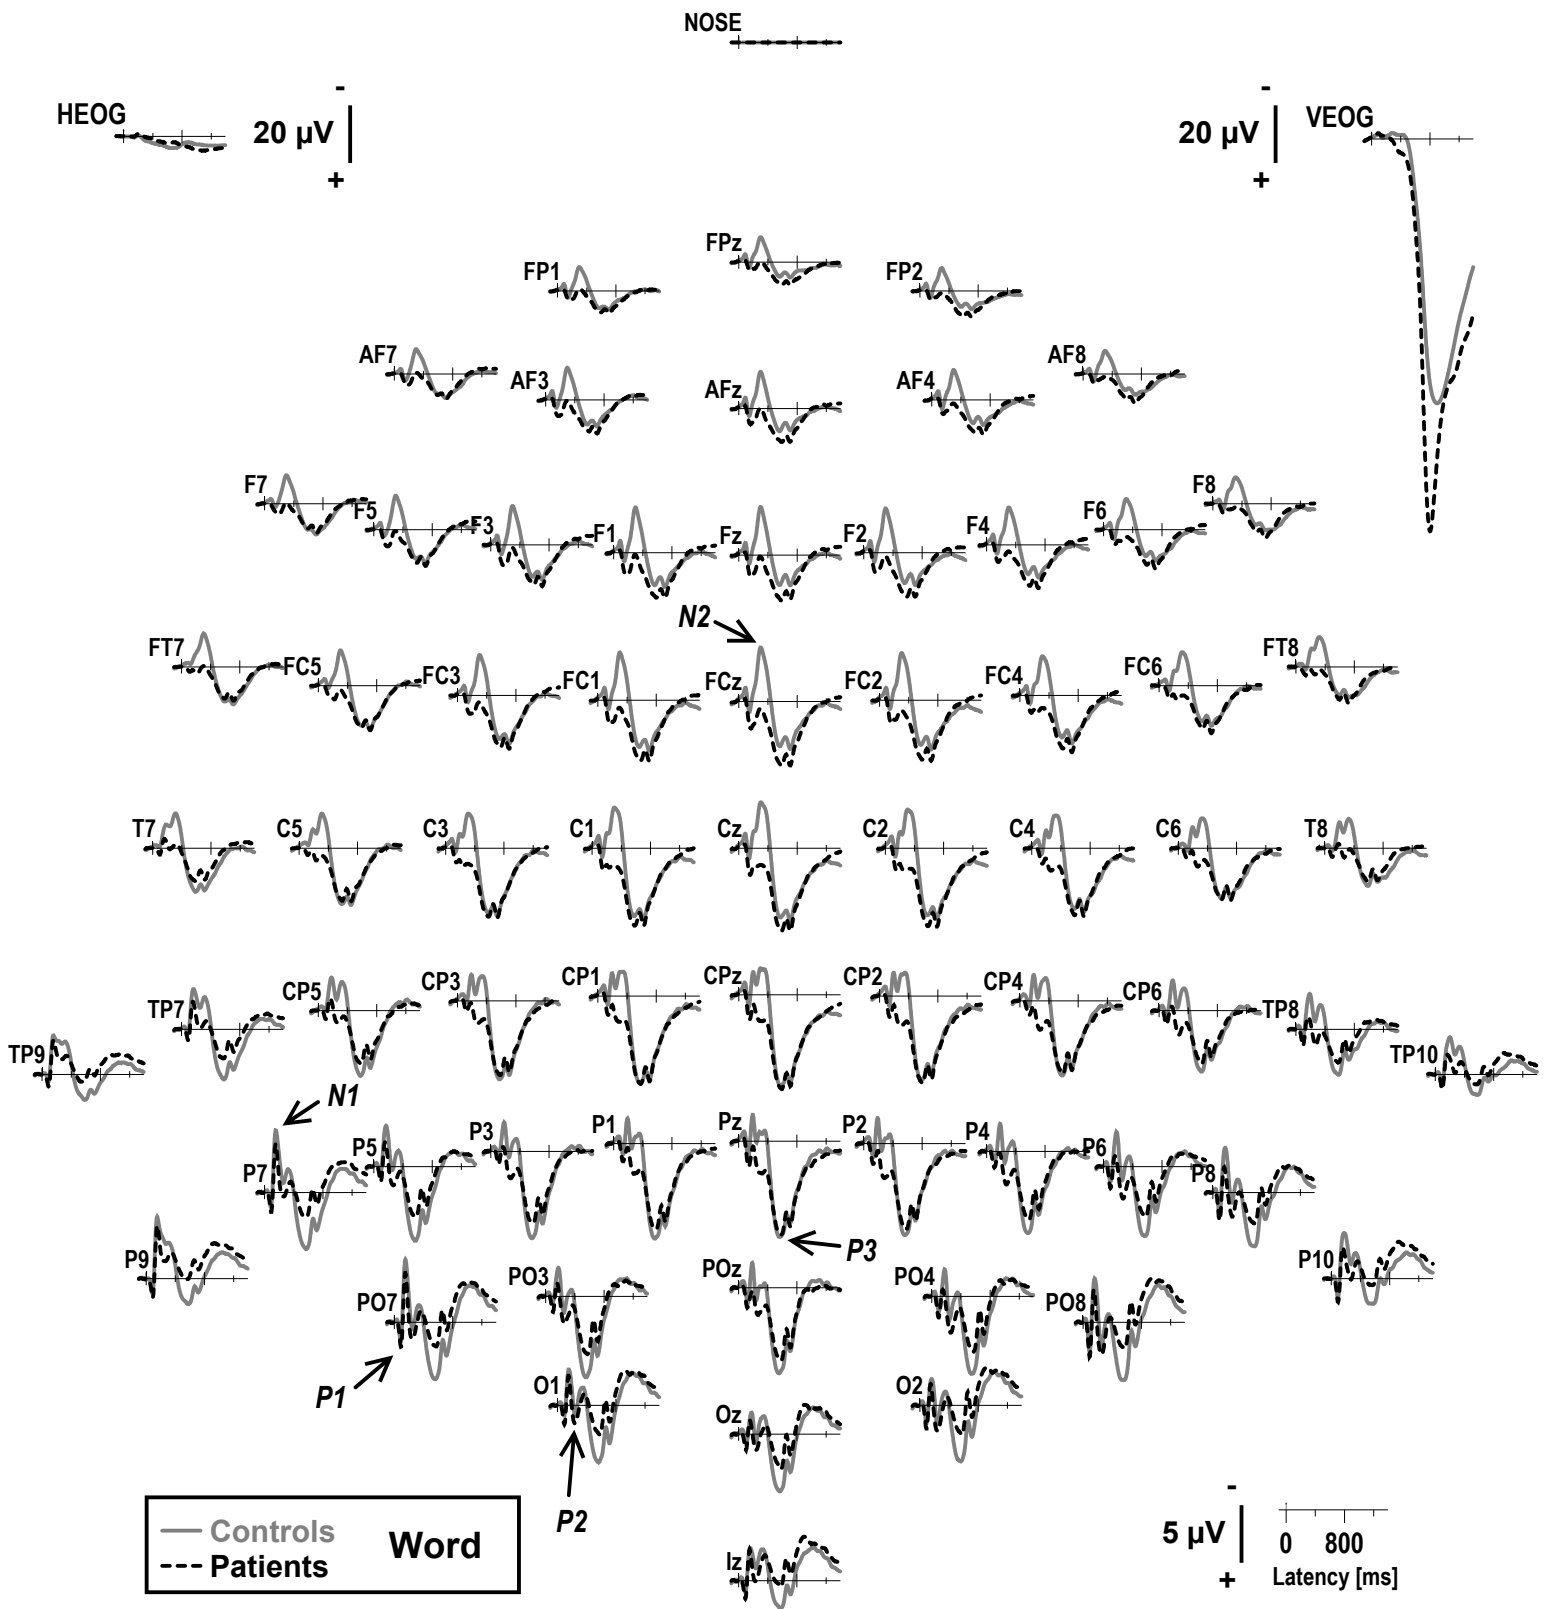

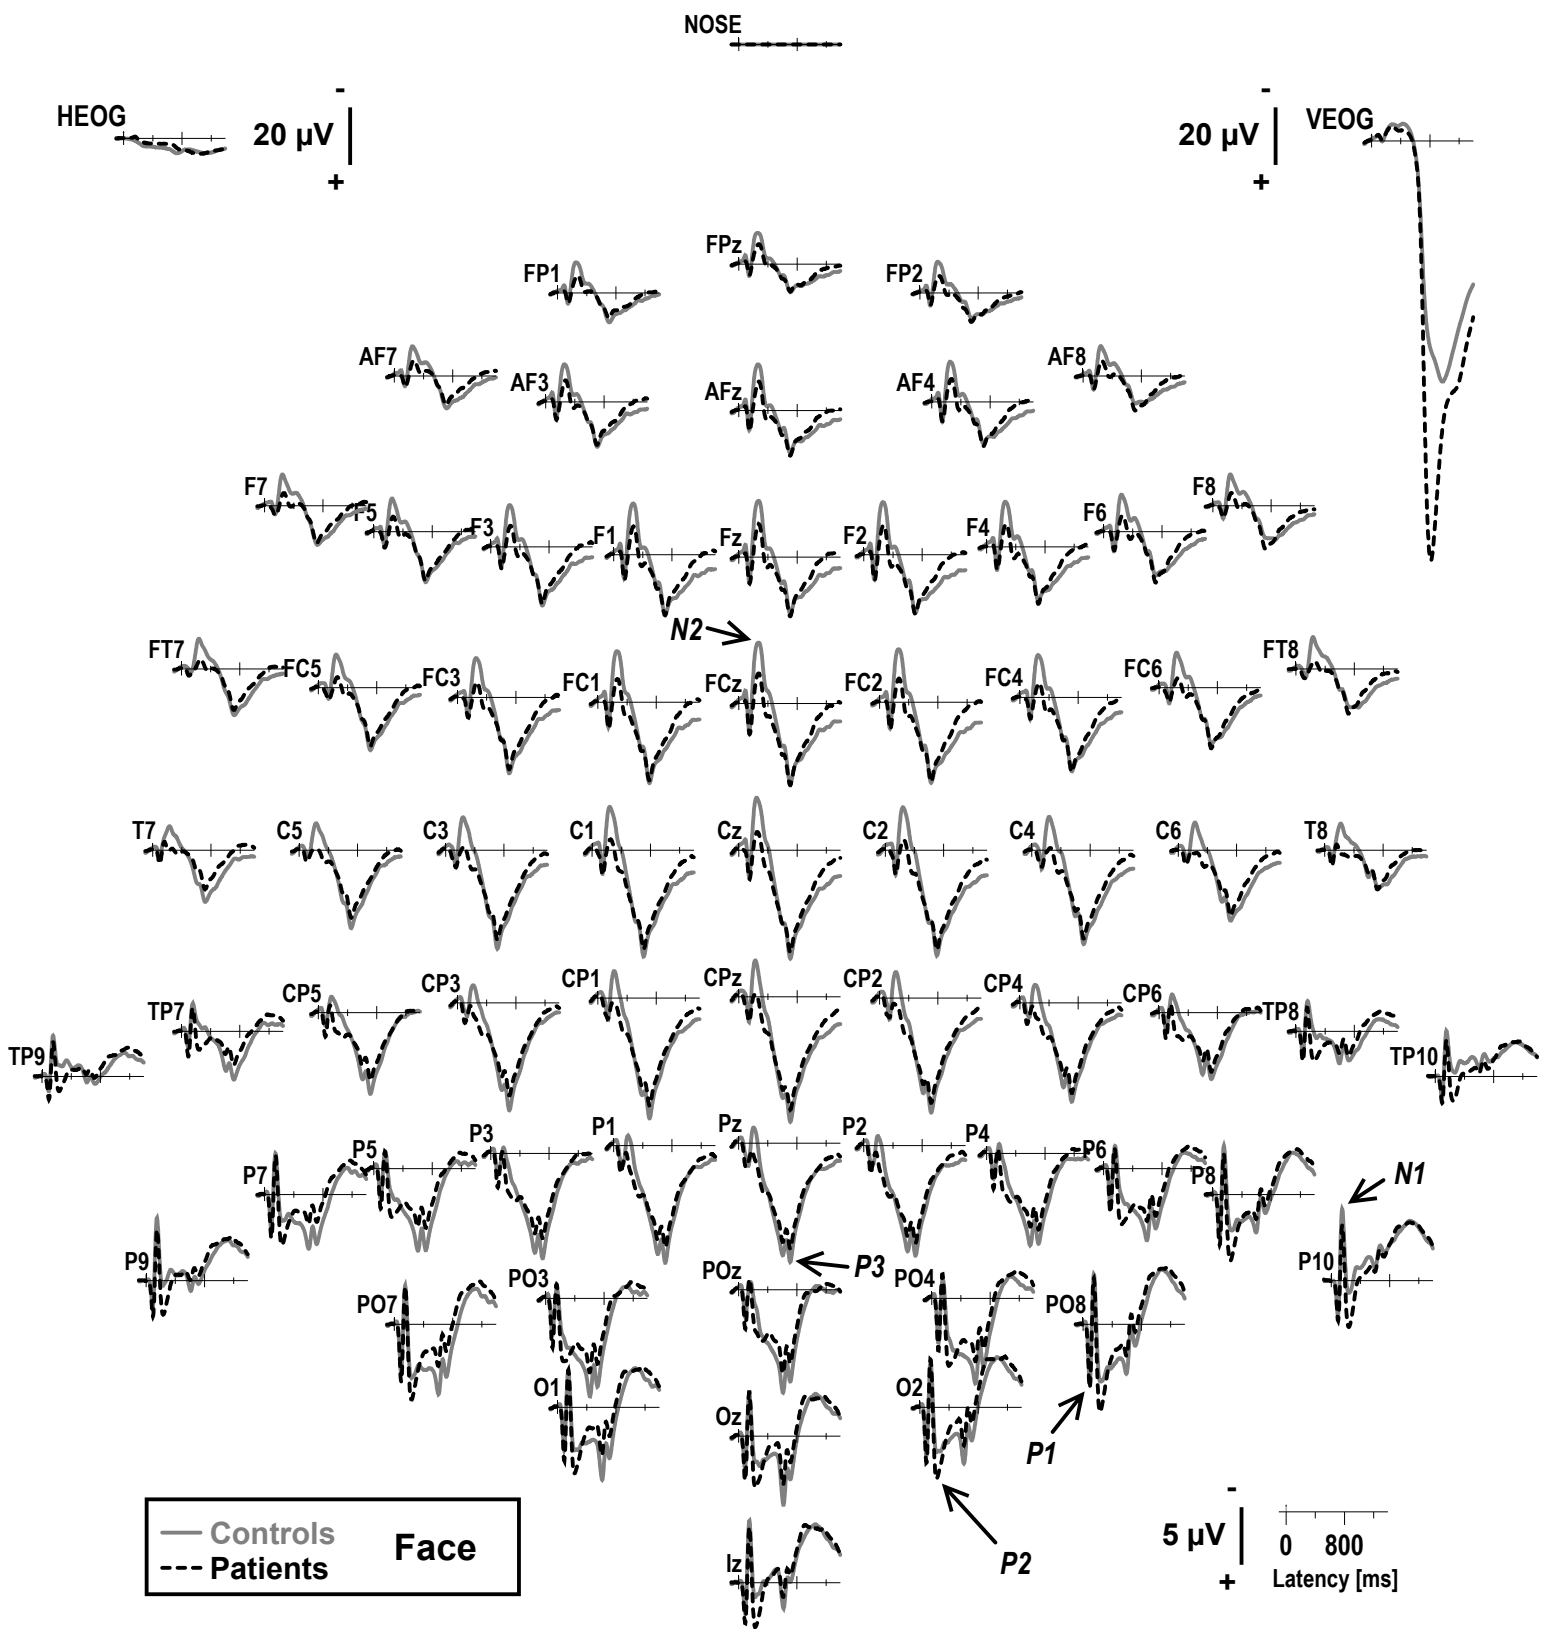

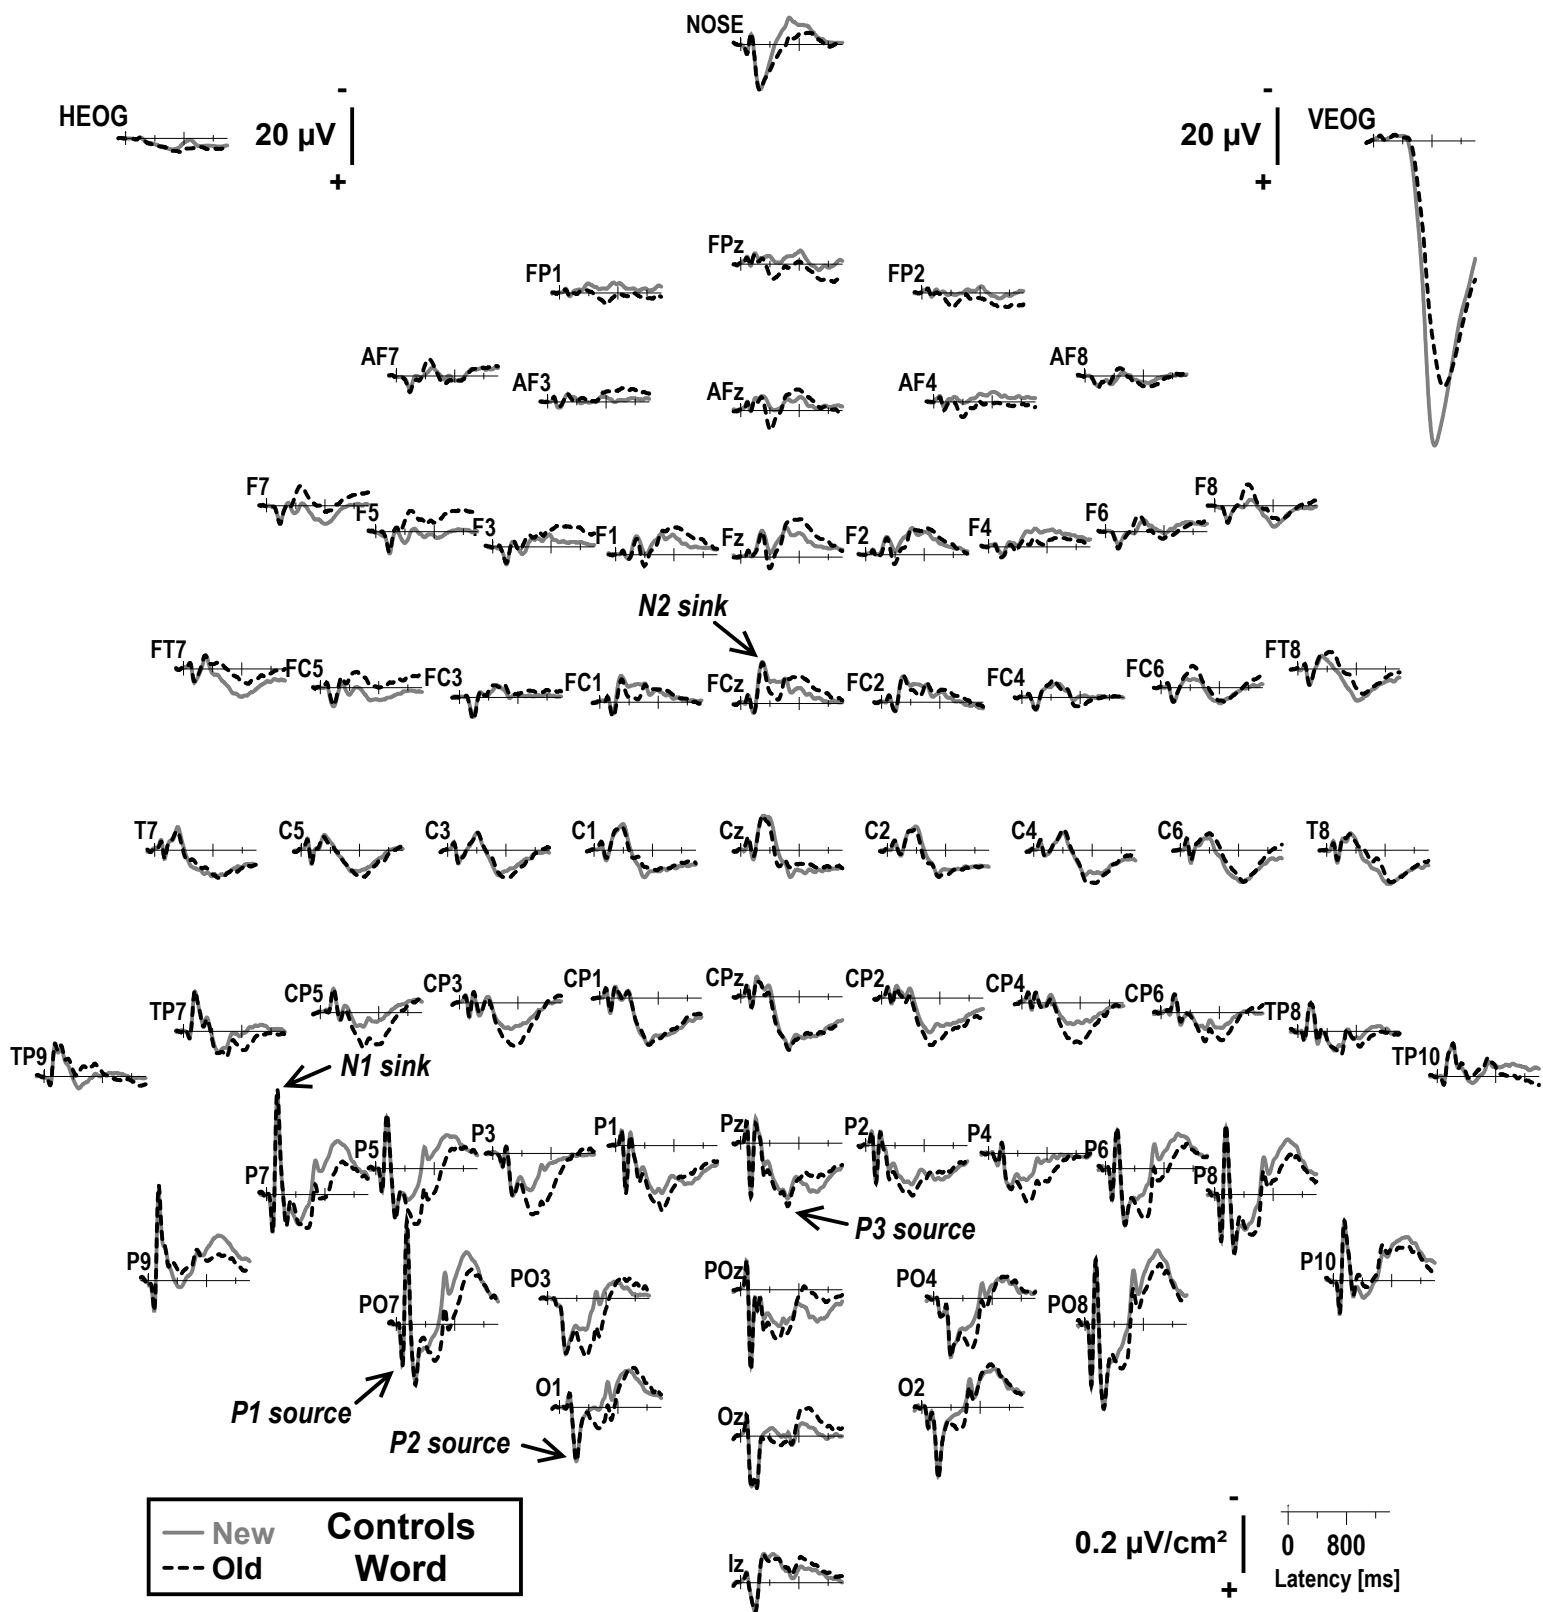

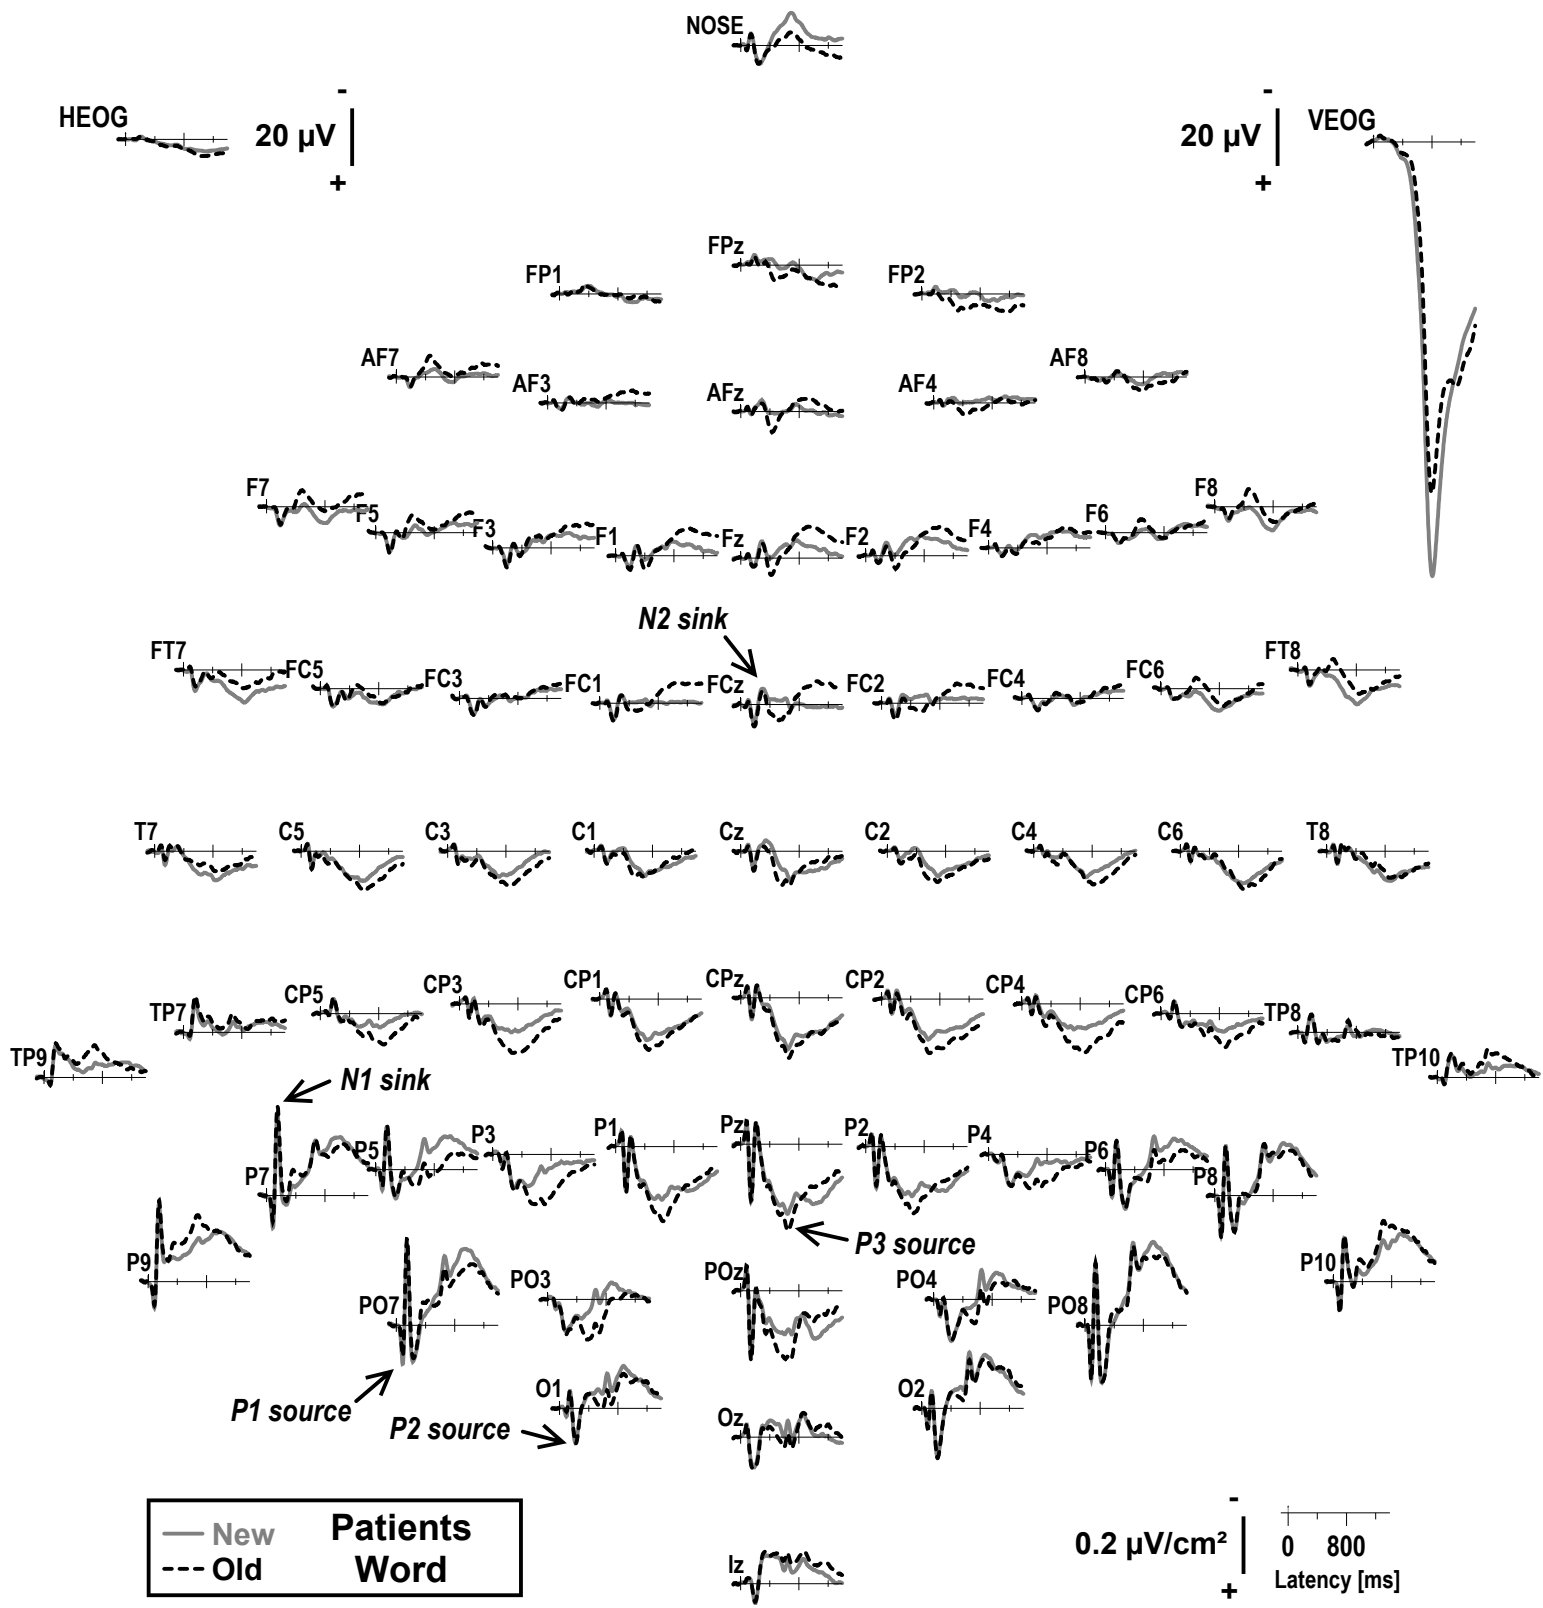

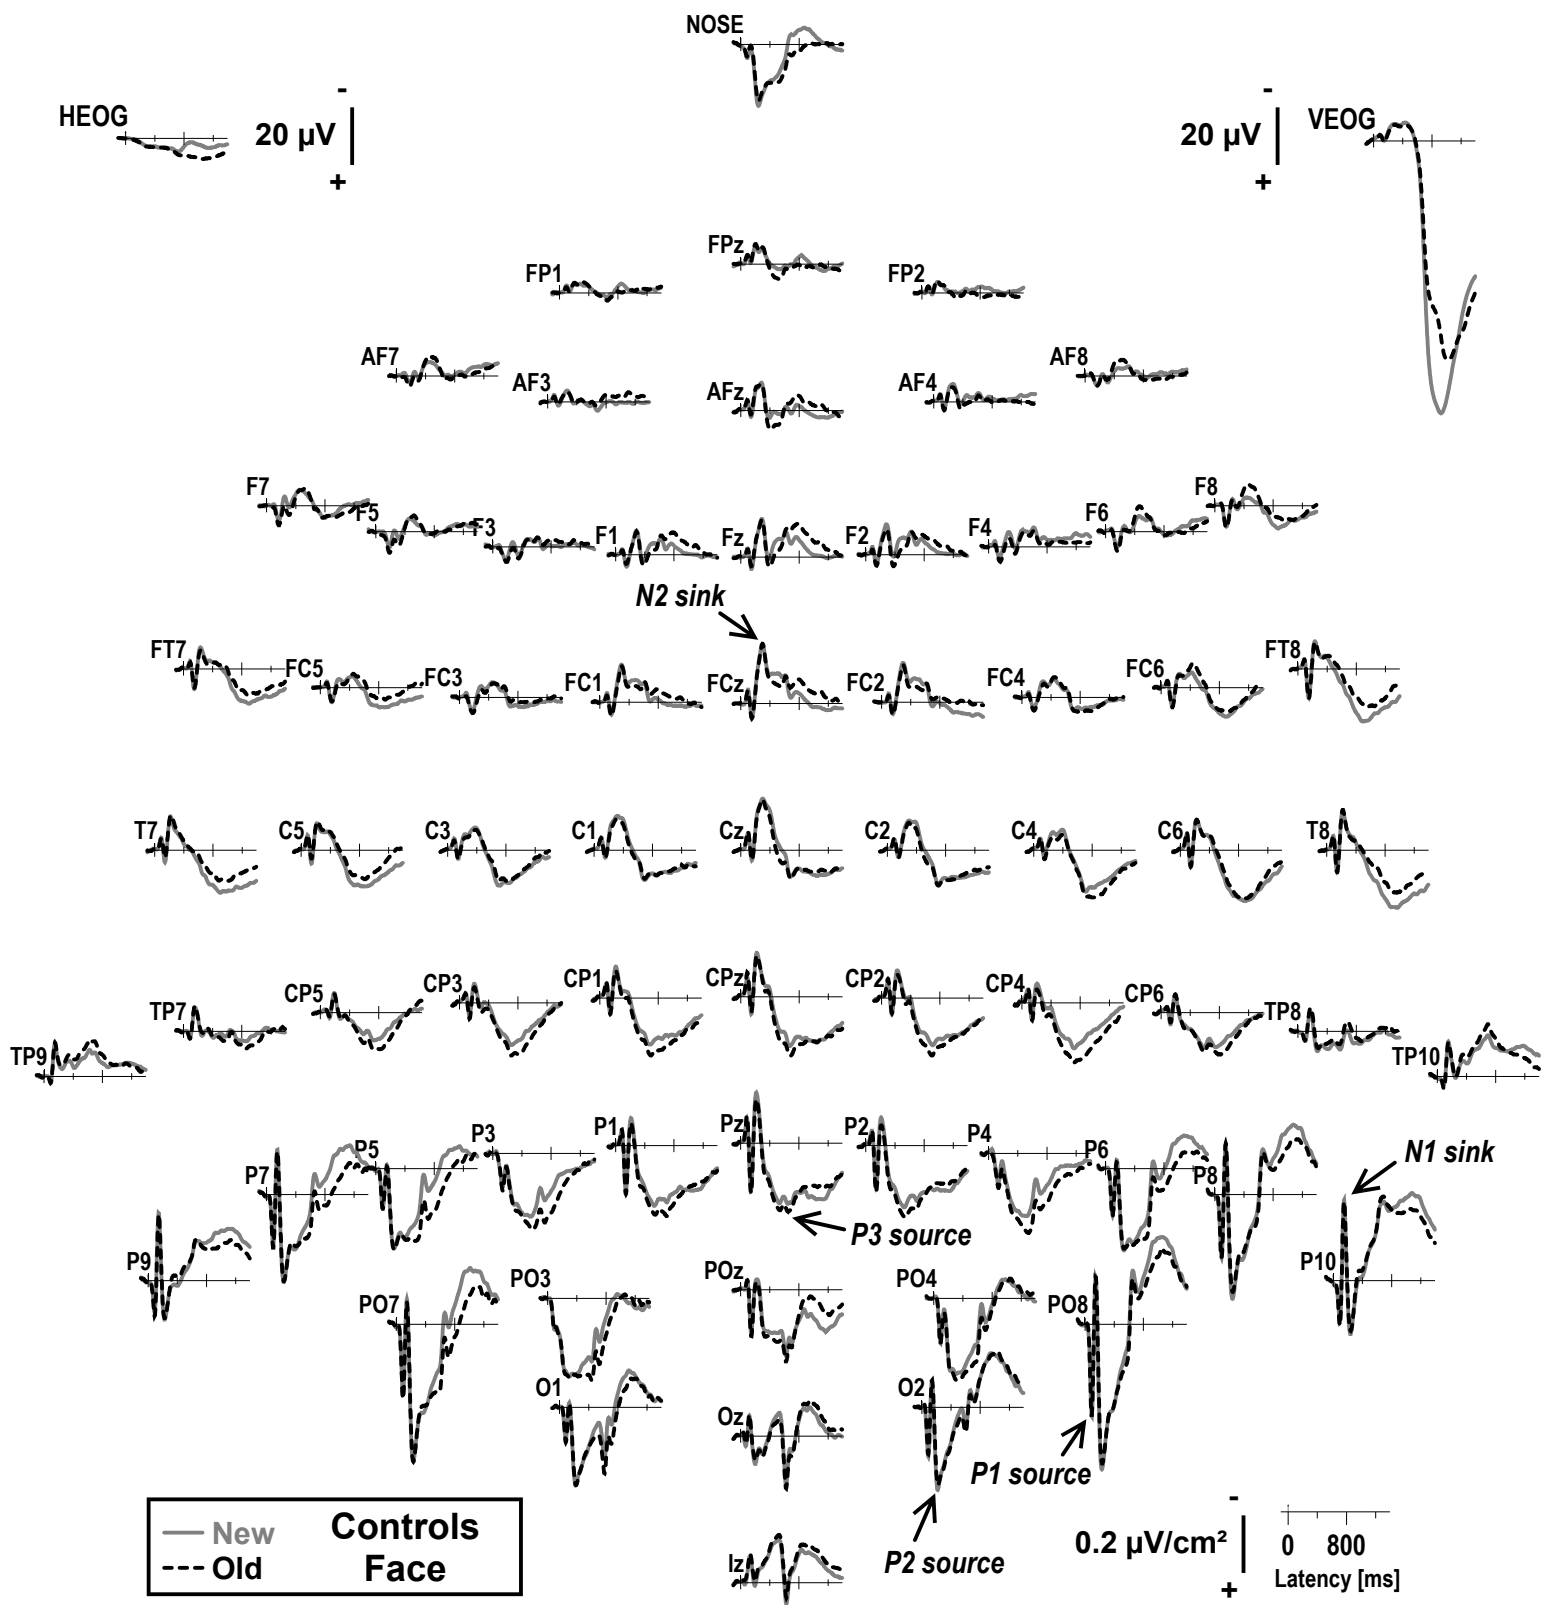

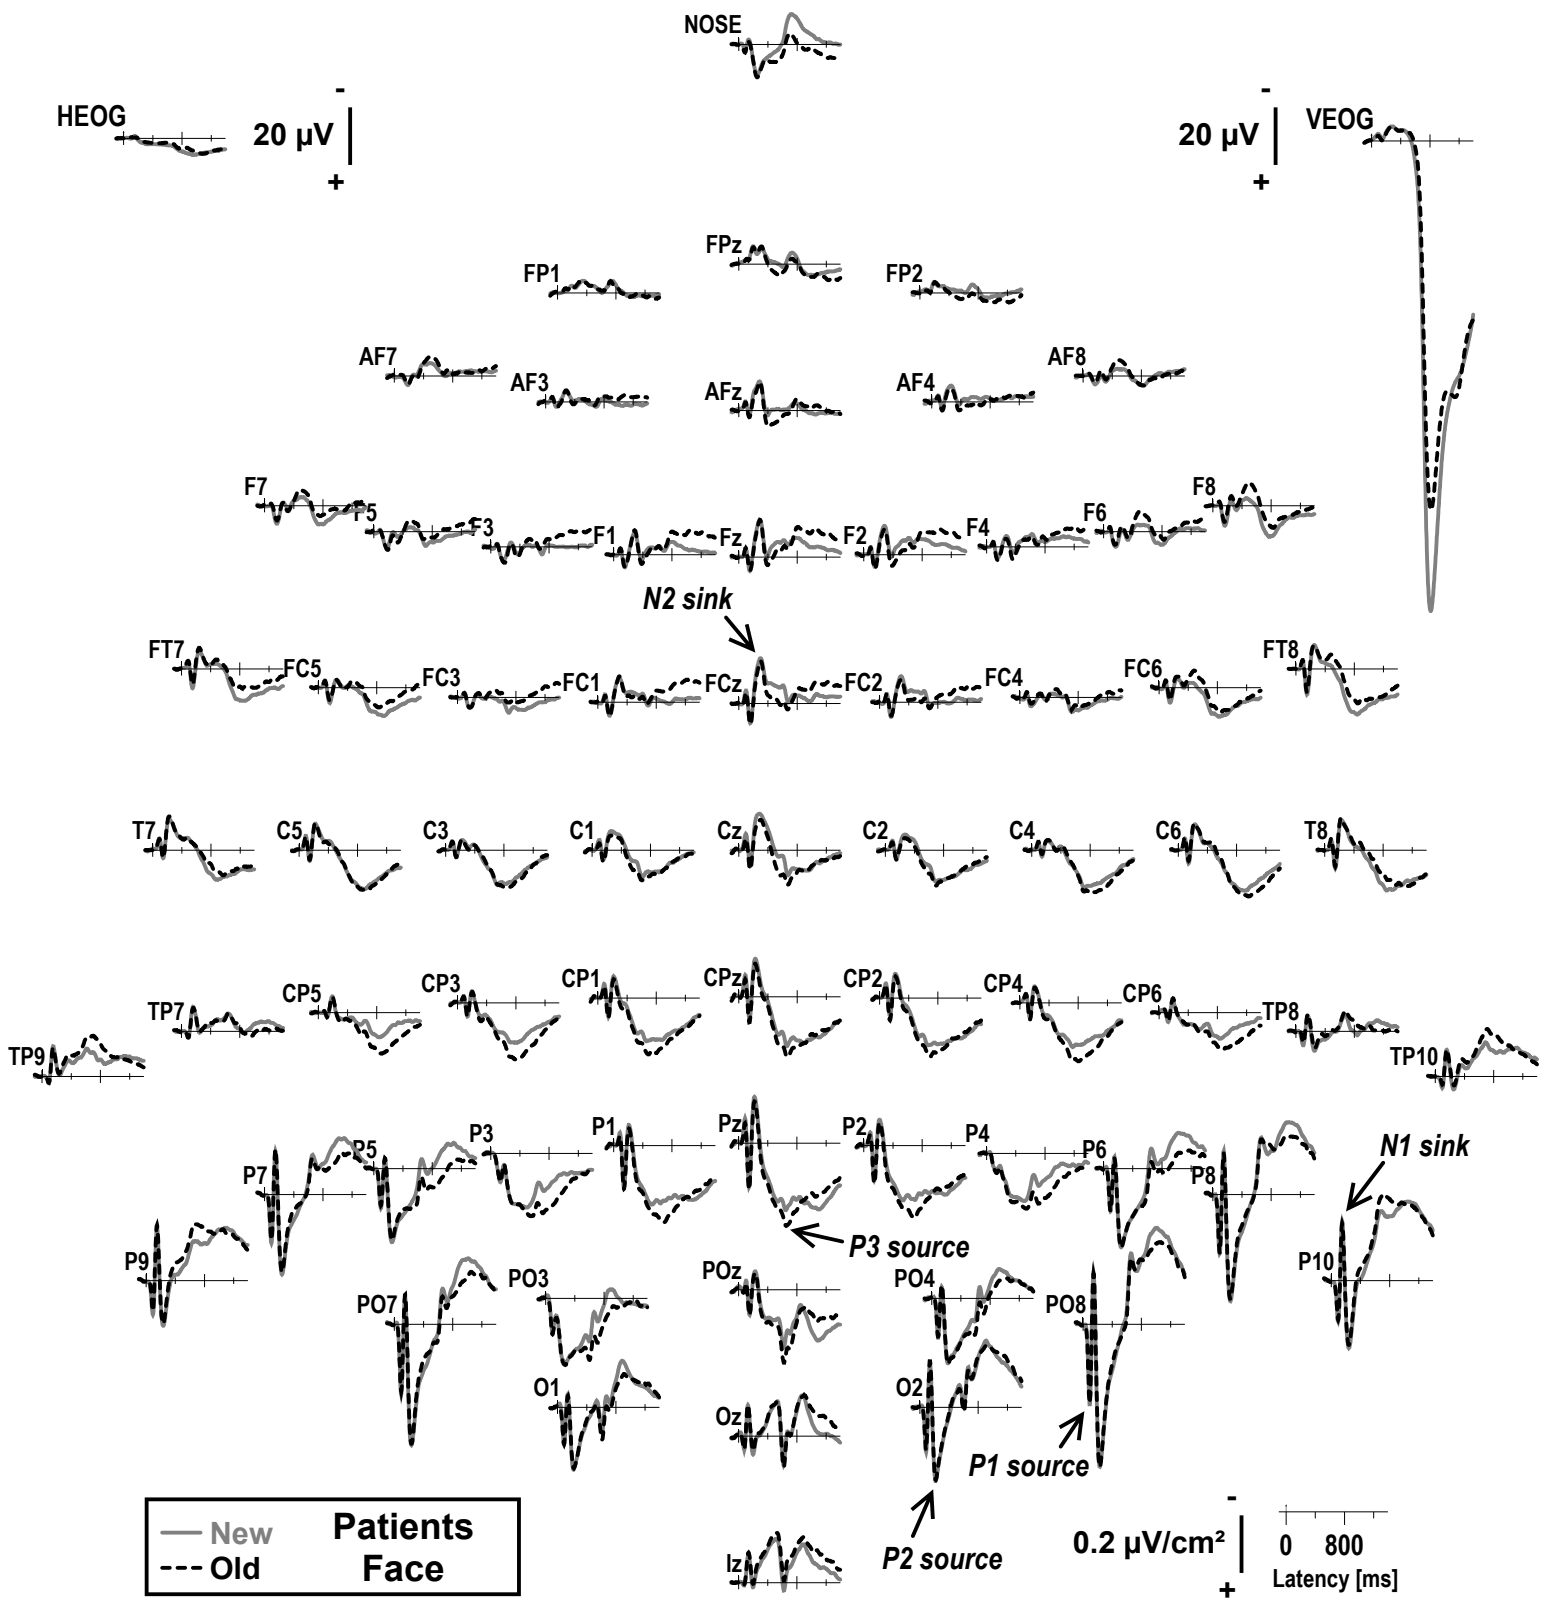

Supplement: NIHMS163402-supplement-01.pdf [file NIHMS163402-supplement-01.pdf]
